# Supplementary material
Source: MDPI journal article supplement (https://www.mdpi.com/2036-7481/13/3/39)
Supplement: s1 [file s1]

Archive with 3 entries (3 files):
- Supplementary Figure S1. Strains without Cd growth.pdf
- Supplementary Figure S2. EDX spectra some strains.pdf
- Supplementary Figure S3. FT-IR Spectra.pdf
