# Supplementary material
Source: MDPI journal article supplement (https://www.mdpi.com/2036-7481/13/3/39)
Supplement: s1 [file s1]

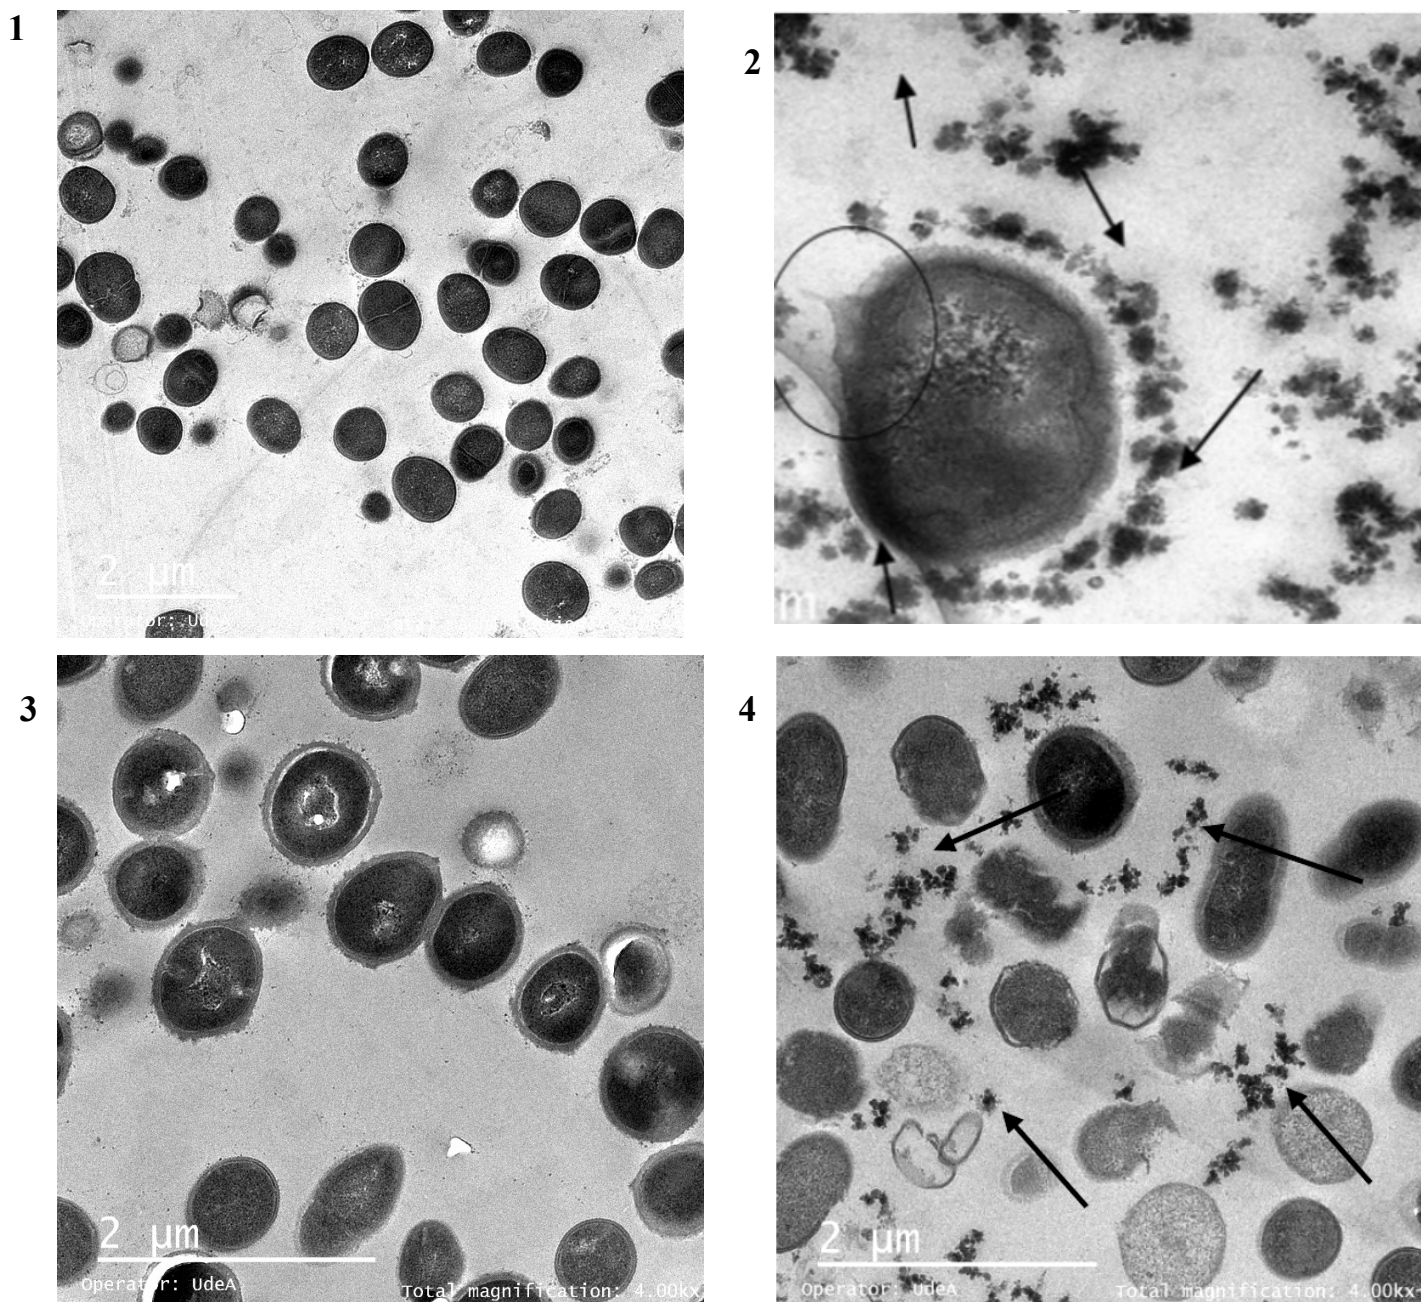

Supplementary Figure S1. Native strains *Staphylococcus* sp. (2-3) and *Dermacoccus* sp. (4-3). Numbers 1 and 3 cells without Cd; numbers 2 and 4 cells treated with 15 mg/L Cd. Circle in 2 presents exopolysaccharides in *Staphylococcus* sp.; arrows indicated Cd granules interaction with cell wall.
