# Supplementary material
Source: MDPI journal article supplement (https://www.mdpi.com/2036-7481/13/3/39)
Supplement: s1 [file s1 › Supplementary Figure S2. EDX spectra some strains.pdf]

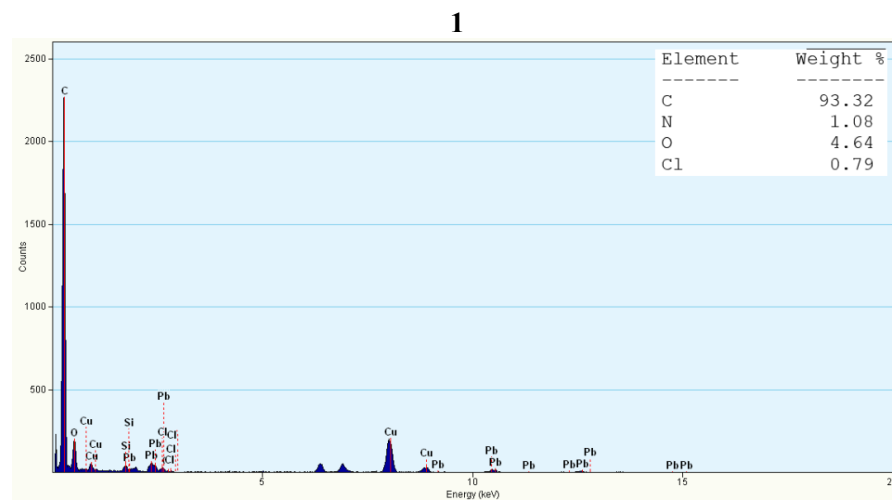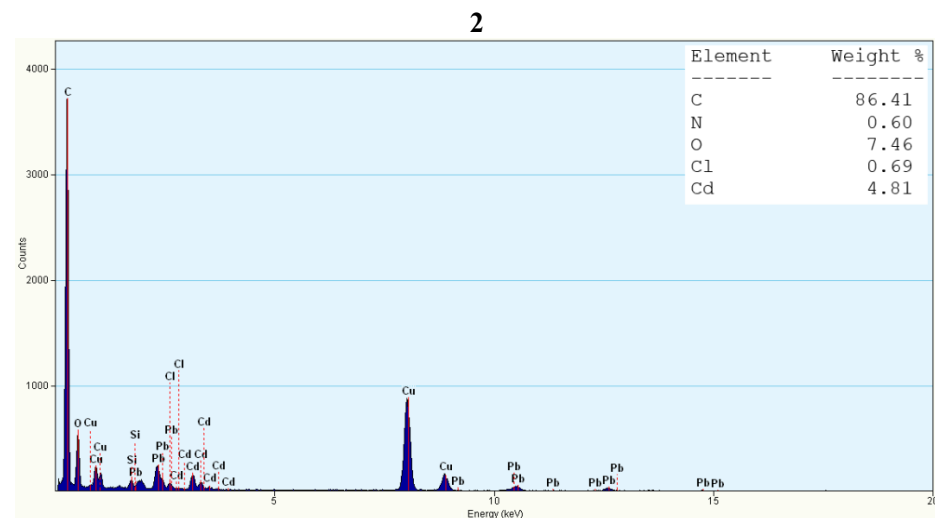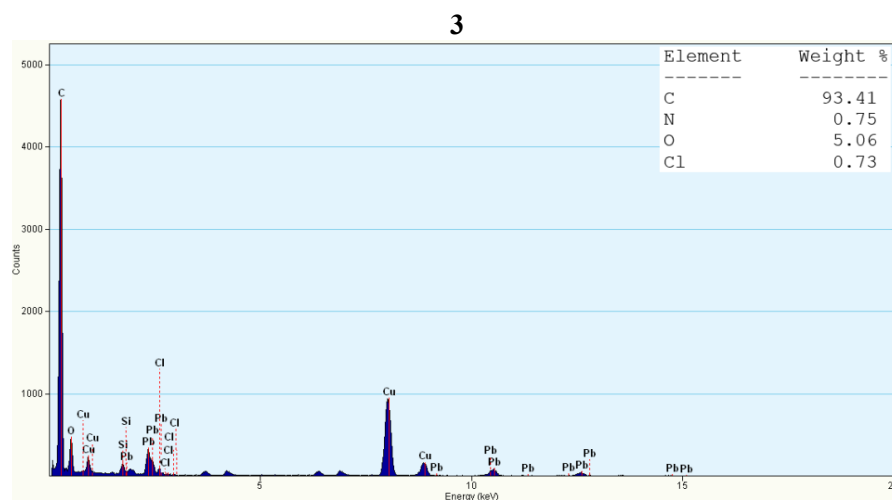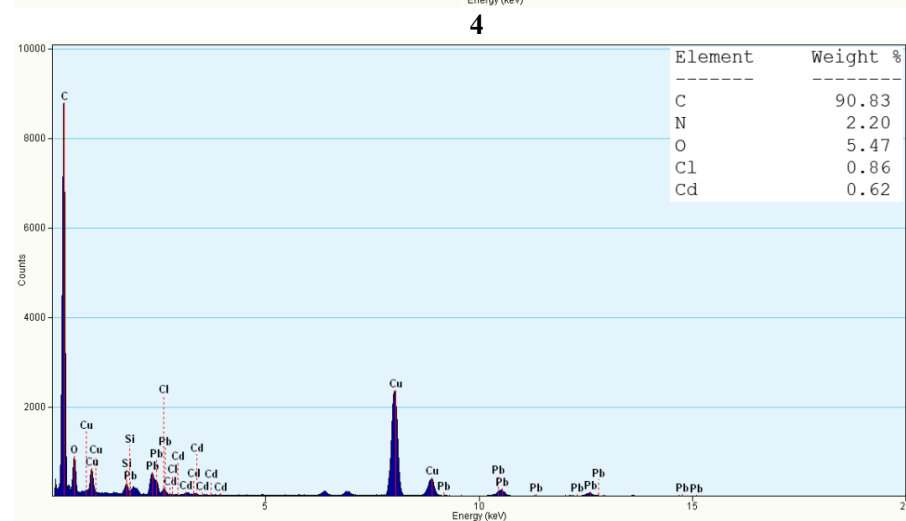

Figure S2. EDX spectra some strains. Number 1 and 2: *Klebsiella* sp. (18-4A); Number 3 and 4: *Enterobacter* sp. (29-4B). 1 and 3 before; 2 and 4 After to Cd absorption. Peaks in 3.4 Kev in pics 2 and 4, changes N and O levels.
