# Supplementary material
Source: MDPI journal article supplement (https://www.mdpi.com/2036-7481/13/3/39)
Supplement: s1 [file s1 › Supplementary Figure S3. FT-IR Spectra.pdf]

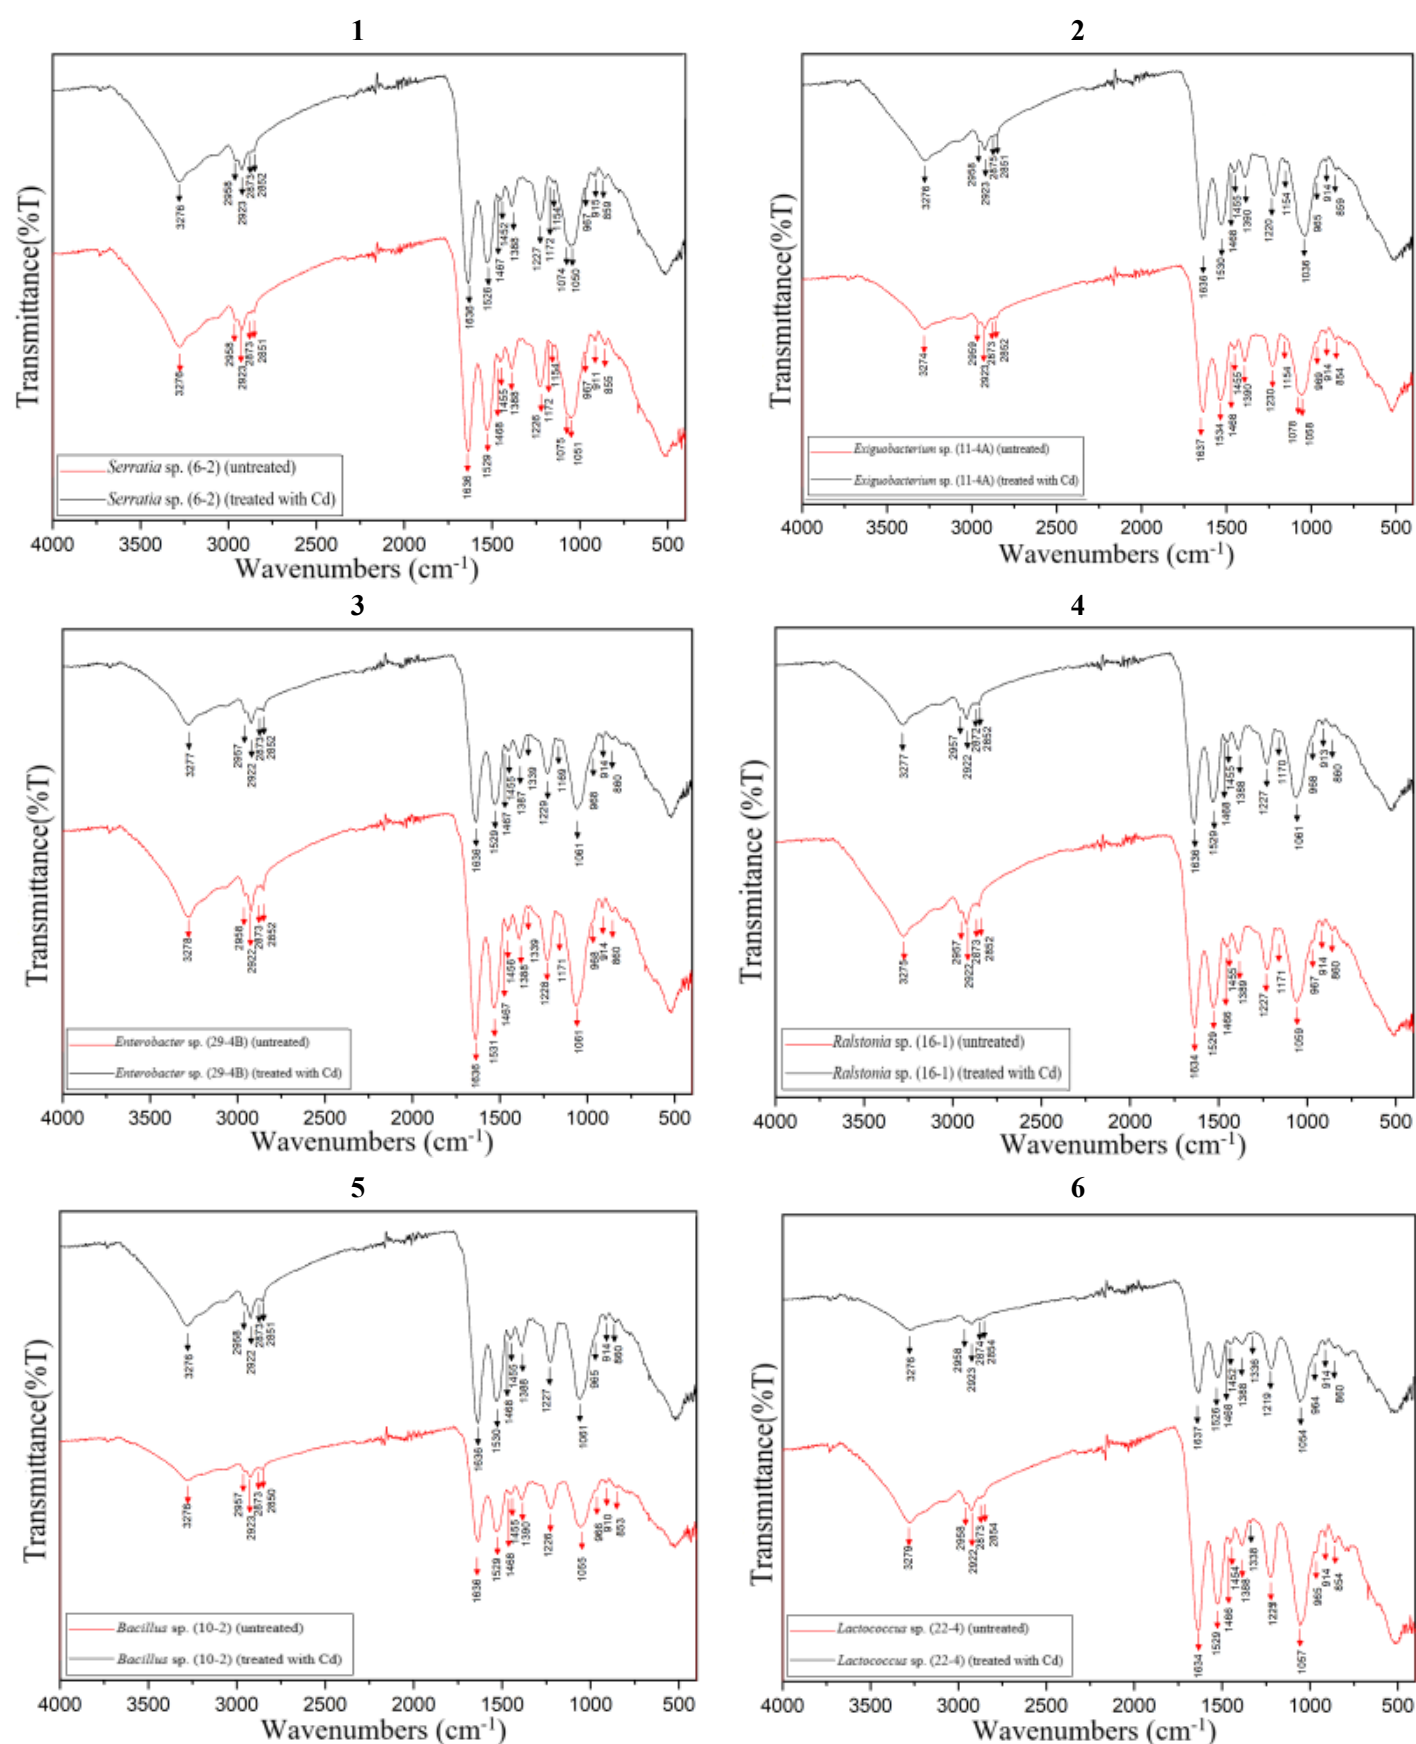

Figure S3. FT-IR spectra of bacteria strains. 1. *Serratia* sp. (6-2); 2. *Exiguobacterium* sp. (11-4A); 3. *Enterobacter* sp. (29-4B); 4. *Ralstonia* sp. (16-1); 5. *Bacillus* sp. (10-2); 6. *Lactococcus* sp. (22-4). Red line cells without Cd, Black line cells in presence of Cd.

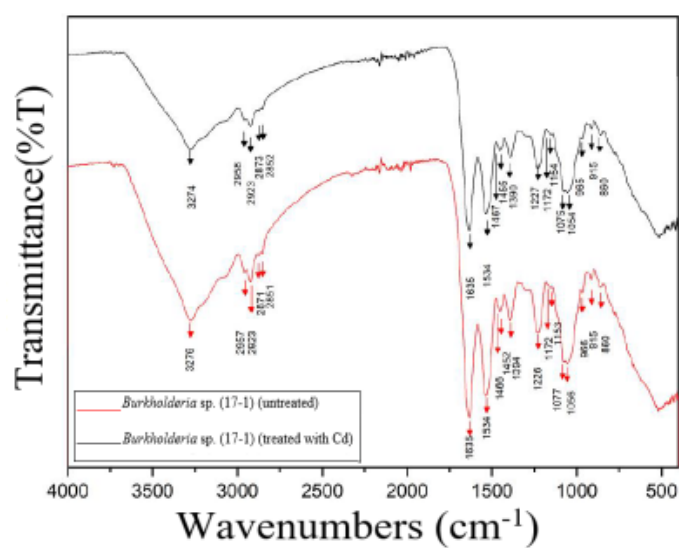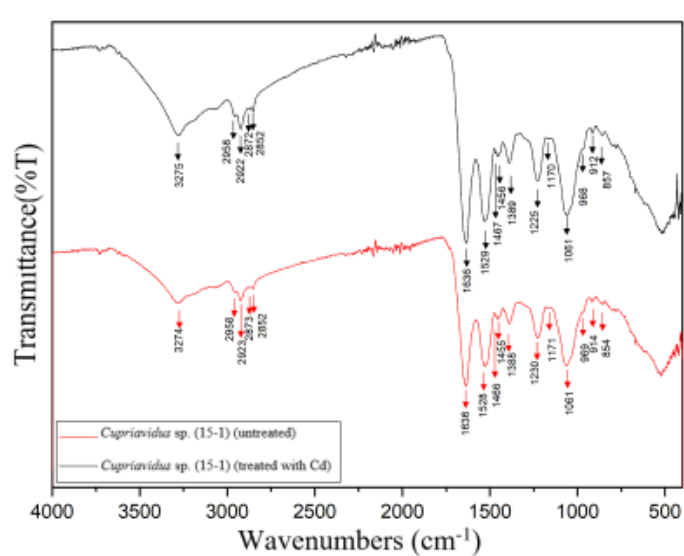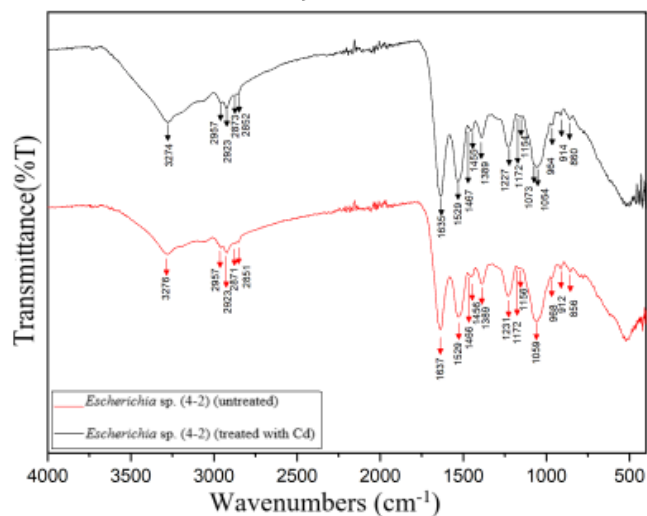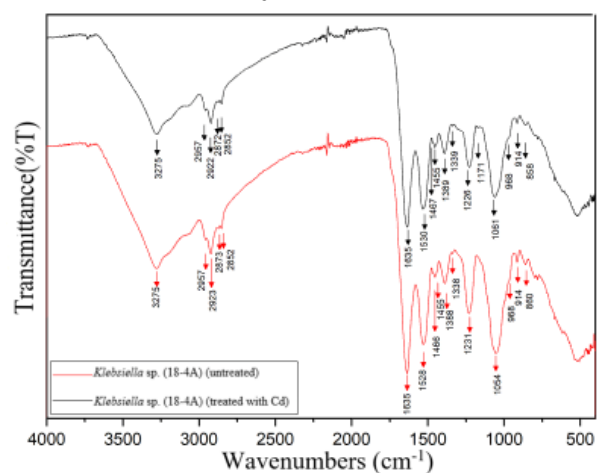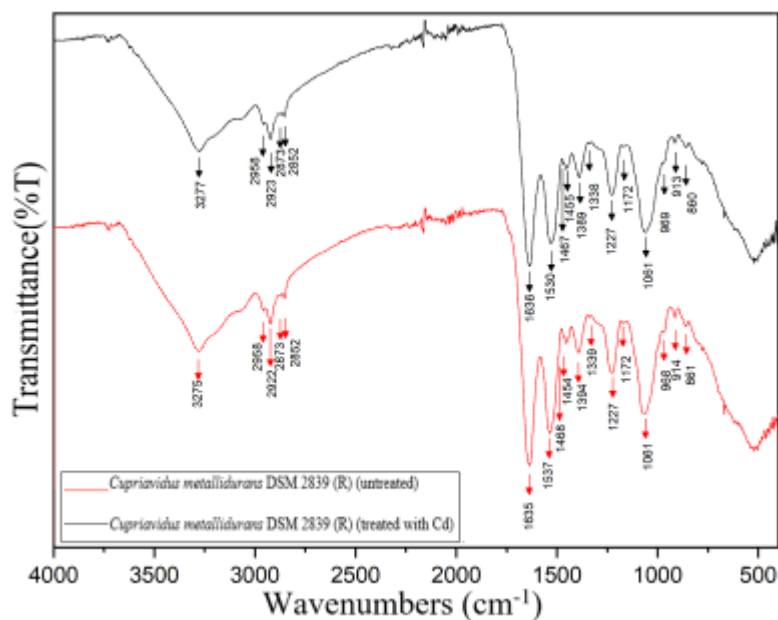

Figure S3 (cont.). FT-IR spectra of bacteria strains: 7. *Burkholderia* sp. (17-1); 8. *Cupriavidus* sp. (15-1); 9. *Escherichia* sp. (4-2); 10. *Klebsiella* sp. (18-4A); 11. *Cupriavidus metallidurans* DSM 2839 (R). Red line cells without Cd, Black line cells in presence of Cd.
